# Supplementary material
Source: PubMed Central journal article supplement (PMC10041999)
Supplement: NIHMS1831763-supplement-Supl_Info.pdf [file NIHMS1831763-supplement-Supl_Info.pdf]

| ID              | Structure                                                                           | AC50  | set |
|-----------------|-------------------------------------------------------------------------------------|-------|-----|
| NCGC00387931-01 | 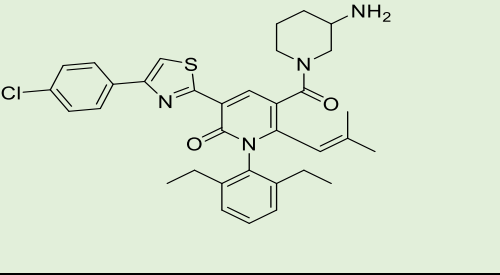   | 23.49 | 1   |
| NCGC00356189-01 |    | 16.63 | 1   |
| NCGC00355560-01 |   | 29.57 | 1   |
| NCGC00389170-01 |  | 23.49 | 1   |
| NCGC00356411-01 |  | 5.90  | 1   |
| NCGC00389110-02 |  | 16.63 | 1   |

|                 |                                                                                     |       |   |
|-----------------|-------------------------------------------------------------------------------------|-------|---|
| NCGC00389171-01 | 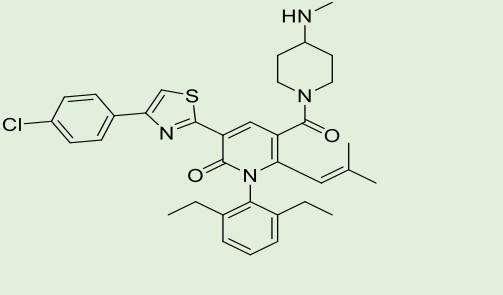   | 26.35 | 1 |
| NCGC00355564-01 |    | 23.49 | 1 |
| NCGC00381883-01 |   | 2.35  | 2 |
| NCGC00484029-03 |  | 1.32  | 2 |
| NCGC00483106-01 |  | 20.93 | 2 |
| NCGC00433867-03 |  | 20.93 | 2 |

|                 |                                                                                     |       |   |
|-----------------|-------------------------------------------------------------------------------------|-------|---|
| NCGC00481486-01 | 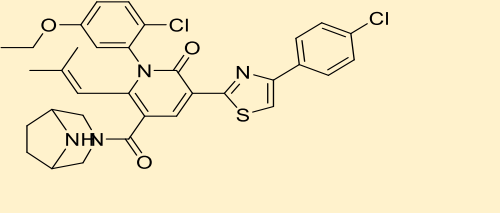   | 14.82 | 2 |
| NCGC00484009-01 |    | 18.65 | 2 |
| NCGC00404354-01 |    | 20.93 | 2 |
| NCGC00378408-01 |   | 21.07 | 2 |
| NCGC00387435-01 |  | 20.93 | 2 |
| NCGC00481478-01 |  | 20.93 | 2 |
| NCGC00481629-01 |  | 23.49 | 2 |

|                 |                                                                                     |       |   |
|-----------------|-------------------------------------------------------------------------------------|-------|---|
| NCGC00015233-06 | 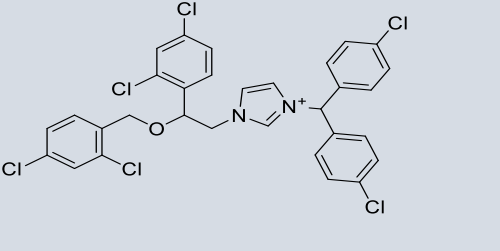   | 16.63 | 3 |
| NCGC00378370-01 |    | 10.49 | 3 |
| NCGC00481628-01 |    | 23.49 | 3 |
| NCGC00487036-01 |   | 11.77 | 3 |
| NCGC00389145-01 |  | 14.82 | 3 |
| NCGC00387743-01 |  | 8.33  | 3 |

|                        |                                                                                   |              |          |
|------------------------|-----------------------------------------------------------------------------------|--------------|----------|
| <p>NCGC00355560-01</p> | 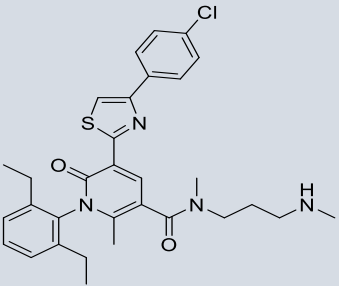 | <p>20.93</p> | <p>3</p> |
| <p>NCGC00481478-01</p> |  | <p>18.65</p> | <p>3</p> |
| <p>NCGC00378408-01</p> |  | <p>18.78</p> | <p>3</p> |
